# Supplementary material for: Animal Breed Composition Is Associated With the Hindgut Microbiota Structure and β-Lactam Resistance in the Multibreed Angus-Brahman Herd
Source: Front Microbiol. 2019 Aug 13;10:1846. doi: 10.3389/fmicb.2019.01846 (PMC6700273; doi:10.3389/fmicb.2019.01846)
Supplement: TABLE S4 — The OTU prevalence in six BGs. Only OTUs with the significant prevalence correlated with breed composition were included in the table. [file Table_4.XLSX]

## Sheet: Sheet1
Supplementary Table 4. The OTU prevalence in six BGs.
Silva ID	Assigned taxa	Prevalence in BGs
		BG1	BG2	BG3	BG4	BG5	BG6	Pearson correlation coefficient (Rp)	R squared	P value
New.CleanUp.ReferenceOTU32657	k__Bacteria; p__Actinobacteria; c__Coriobacteriia; o__Coriobacteriales; f__Coriobacteriaceae; g__; s__	0.8	0.9	0.846154	0.888889	1	1	0.9125	0.8327	0.0111
AB821729.1.1501	k__Bacteria; p__Actinobacteria; c__Coriobacteriia; o__Coriobacteriales; f__Coriobacteriaceae; g__; s__	0.2	0.1	0.307692	0.222222	0.428571	0.666667	0.8946	0.8004	0.0161
AB034002.1.1510	k__Bacteria; p__Actinobacteria; c__Coriobacteriia; o__Coriobacteriales; f__Coriobacteriaceae; g__; s__	0.8	0.85	0.923077	0.833333	0.928571	1	0.868	0.7534	0.025
LC028826.1.1522	k__Bacteria; p__Bacteroidetes; c__Bacteroidia; o__Bacteroidales; f__; g__; s__	0.6	0.65	0.769231	0.722222	0.928571	0.933333	0.9372	0.8784	0.0058
EU777182.1.1345	k__Bacteria; p__Bacteroidetes; c__Bacteroidia; o__Bacteroidales; f__; g__; s__	0.666667	0.8	0.769231	0.777778	0.785714	0.866667	0.8399	0.7054	0.0364
AY244882.1.1488	k__Bacteria; p__Bacteroidetes; c__Bacteroidia; o__Bacteroidales; f__; g__; s__	0.666667	0.7	0.769231	0.611111	0.571429	0.466667	-0.8202	0.6727	0.0456
EU469967.1.1402	k__Bacteria; p__Bacteroidetes; c__Bacteroidia; o__Bacteroidales; f__Bacteroidaceae; g__; s__	0.6	0.55	0.615385	0.5	0.142857	0.0666667	-0.9202	0.8467	0.0093
GQ448729.1.1393	k__Bacteria; p__Bacteroidetes; c__Bacteroidia; o__Bacteroidales; f__Bacteroidaceae; g__; s__	0.333333	0.4	0.461538	0.5	0.571429	0.533333	0.8865	0.7858	0.0186
EU464226.1.1402	k__Bacteria; p__Bacteroidetes; c__Bacteroidia; o__Bacteroidales; f__Bacteroidaceae; g__; s__	0.733333	0.8	0.846154	0.888889	1	0.933333	0.873	0.7622	0.0232
EU884277.1.1461	k__Bacteria; p__Bacteroidetes; c__Bacteroidia; o__Bacteroidales; f__Bacteroidaceae; g__5-7N15; s__	0.4	0.5	0.307692	0.555556	0.642857	0.866667	0.8778	0.7706	0.0215
EU475408.1.1398	k__Bacteria; p__Bacteroidetes; c__Bacteroidia; o__Bacteroidales; f__Porphyromonadaceae; g__Paludibacter; s__	0	0.05	0.0769231	0.277778	0.642857	0.4	0.8159	0.6656	0.0477
New.ReferenceOTU103	k__Bacteria; p__Bacteroidetes; c__Bacteroidia; o__Bacteroidales; f__RF16; g__; s__	0	0.05	0.153846	0.333333	0.571429	0.4	0.8487	0.7204	0.0326
JX095373.1.1393	k__Bacteria; p__Bacteroidetes; c__Bacteroidia; o__Bacteroidales; f__RF16; g__; s__	0.8	0.95	0.923077	0.944444	1	1	0.8449	0.7139	0.0342
JX095568.1.1395	k__Bacteria; p__Bacteroidetes; c__Bacteroidia; o__Bacteroidales; f__Rikenellaceae; g__; s__	0.733333	0.75	0.615385	0.611111	0.214286	0.266667	-0.9032	0.8158	0.0136
EU773167.1.1399	k__Bacteria; p__Bacteroidetes; c__Bacteroidia; o__Bacteroidales; f__Rikenellaceae; g__; s__	0.6	0.75	0.769231	0.833333	0.857143	0.866667	0.8815	0.777	0.0202
New.CleanUp.ReferenceOTU8588	k__Bacteria; p__Bacteroidetes; c__Bacteroidia; o__Bacteroidales; f__Rikenellaceae; g__; s__	0.266667	0.55	0.461538	0.833333	0.928571	0.866667	0.8689	0.755	0.0246
CCIZ01000013.190076.191585	k__Bacteria; p__Bacteroidetes; c__Bacteroidia; o__Bacteroidales; f__Rikenellaceae; g__; s__	0.266667	0.45	0.307692	0.333333	0.428571	0.6	0.8143	0.663	0.0485
EU465609.1.1357	k__Bacteria; p__Chloroflexi; c__Anaerolineae; o__Anaerolineales; f__Anaerolinaceae; g__SHD-231; s__	0.0666667	0.05	0.0769231	0.333333	0.5	0.6	0.9413	0.886	0.0051
New.CleanUp.ReferenceOTU22138	k__Bacteria; p__Chloroflexi; c__Anaerolineae; o__Anaerolineales; f__Anaerolinaceae; g__SHD-231; s__	0.2	0.35	0.461538	0.333333	0.642857	0.666667	0.9133	0.8341	0.0109
GQ327480.1.1307	k__Bacteria; p__Chloroflexi; c__Anaerolineae; o__Anaerolineales; f__Anaerolinaceae; g__SHD-231; s__	0.666667	0.9	0.846154	1	1	1	0.8185	0.67	0.0464
EU381832.1.1457	k__Bacteria; p__Chloroflexi; c__Anaerolineae; o__Anaerolineales; f__Anaerolinaceae; g__SHD-231; s__	0.866667	0.95	0.923077	0.944444	0.928571	1	0.8149	0.664	0.0482
AB494937.1.1515	k__Bacteria; p__Cyanobacteria; c__4C0d-2; o__YS2; f__; g__; s__	0.2	0.25	0.384615	0.277778	0.357143	0.533333	0.8835	0.7806	0.0196
EU465848.1.1412	k__Bacteria; p__Firmicutes; c__Bacilli; o__Bacillales; f__Bacillaceae; g__Bacillus; s__	0.133333	0.45	0.384615	0.555556	0.571429	0.6	0.8489	0.7207	0.0325
EU844346.1.1499	k__Bacteria; p__Firmicutes; c__Clostridia; o__Clostridiales; f__; g__; s__	0.0666667	0.25	0.307692	0.5	0.714286	0.733333	0.9634	0.9281	0.002
EU381629.1.1475	k__Bacteria; p__Firmicutes; c__Clostridia; o__Clostridiales; f__; g__; s__	0.266667	0.5	0.461538	0.666667	0.642857	0.733333	0.9027	0.815	0.0137
New.CleanUp.ReferenceOTU2124	k__Bacteria; p__Firmicutes; c__Clostridia; o__Clostridiales; f__; g__; s__	0.466667	0.75	0.692308	0.722222	0.785714	0.933333	0.9013	0.8123	0.0141
DQ394667.1.1517	k__Bacteria; p__Firmicutes; c__Clostridia; o__Clostridiales; f__; g__; s__	0.466667	0.75	0.538462	0.777778	0.857143	1	0.8996	0.8094	0.0146
EU381750.1.1487	k__Bacteria; p__Firmicutes; c__Clostridia; o__Clostridiales; f__; g__; s__	0.133333	0.25	0.153846	0.444444	0.571429	0.533333	0.8781	0.771	0.0214
AB185631.1.1534	k__Bacteria; p__Firmicutes; c__Clostridia; o__Clostridiales; f__; g__; s__	0.133333	0.4	0.307692	0.222222	0.428571	0.8	0.8611	0.7414	0.0276
New.CleanUp.ReferenceOTU25249	k__Bacteria; p__Firmicutes; c__Clostridia; o__Clostridiales; f__; g__; s__	0.2	0.3	0.461538	0.333333	0.428571	0.533333	0.8555	0.7318	0.0298
New.CleanUp.ReferenceOTU27947	k__Bacteria; p__Firmicutes; c__Clostridia; o__Clostridiales; f__; g__; s__	0.733333	0.55	0.615385	0.444444	0.571429	0.333333	-0.831	0.6906	0.0404
New.CleanUp.ReferenceOTU3211	k__Bacteria; p__Firmicutes; c__Clostridia; o__Clostridiales; f__; g__; s__	0.466667	0.6	0.384615	0.388889	0.357143	0.2	-0.8285	0.6864	0.0416
EU774746.1.1404	k__Bacteria; p__Firmicutes; c__Clostridia; o__Clostridiales; f__; g__; s__	0.733333	0.65	0.769231	0.777778	1	0.933333	0.8217	0.6752	0.0448
EU474431.1.1383	k__Bacteria; p__Firmicutes; c__Clostridia; o__Clostridiales; f__[Mogibacteriaceae]; g__; s__	0.466667	0.6	0.692308	0.555556	0.714286	0.8	0.8665	0.7508	0.0256
CP006905.1192060.1193564	k__Bacteria; p__Firmicutes; c__Clostridia; o__Clostridiales; f__Clostridiaceae; g__Clostridium; s__	0.6	0.55	0.615385	0.555556	0.714286	0.866667	0.85	0.7226	0.032
LC028646.1.1523	k__Bacteria; p__Firmicutes; c__Clostridia; o__Clostridiales; f__Lachnospiraceae; g__; s__	0.733333	0.65	0.692308	0.722222	0.857143	1	0.8705	0.7577	0.0241
GU303941.1.1491	k__Bacteria; p__Firmicutes; c__Clostridia; o__Clostridiales; f__Lachnospiraceae; g__; s__	0.666667	0.7	0.769231	0.611111	0.5	0.133333	-0.8696	0.7561	0.0244
New.CleanUp.ReferenceOTU15398	k__Bacteria; p__Firmicutes; c__Clostridia; o__Clostridiales; f__Lachnospiraceae; g__; s__	0.0666667	0.45	0.384615	0.277778	0.571429	0.666667	0.8613	0.7419	0.0275
DQ801823.1.1388	k__Bacteria; p__Firmicutes; c__Clostridia; o__Clostridiales; f__Lachnospiraceae; g__; s__	0.533333	0.2	0.307692	0.166667	0.0714286	0.0666667	-0.8602	0.74	0.0279
BABA01013952.1.1506	k__Bacteria; p__Firmicutes; c__Clostridia; o__Clostridiales; f__Lachnospiraceae; g__; s__	0.8	0.85	0.769231	0.833333	1	1	0.8527	0.7271	0.0309
New.CleanUp.ReferenceOTU19884	k__Bacteria; p__Firmicutes; c__Clostridia; o__Clostridiales; f__Lachnospiraceae; g__; s__	0.533333	0.6	0.692308	0.777778	0.642857	0.866667	0.8165	0.6666	0.0474
EU843609.1.1521	k__Bacteria; p__Firmicutes; c__Clostridia; o__Clostridiales; f__Lachnospiraceae; g__Butyrivibrio; s__	0.866667	0.85	0.769231	0.777778	0.571429	0.6	-0.9173	0.8414	0.01
New.CleanUp.ReferenceOTU12926	k__Bacteria; p__Firmicutes; c__Clostridia; o__Clostridiales; f__Lachnospiraceae; g__Coprococcus; s__	0.333333	0.55	0.615385	0.611111	0.714286	0.8	0.9436	0.8905	0.0047
DQ115988.1.1485	k__Bacteria; p__Firmicutes; c__Clostridia; o__Clostridiales; f__Lachnospiraceae; g__Coprococcus; s__	0.333333	0.4	0.461538	0.444444	0.428571	0.533333	0.8681	0.7535	0.025
AB506250.1.1525	k__Bacteria; p__Firmicutes; c__Clostridia; o__Clostridiales; f__Ruminococcaceae	0.866667	0.7	0.692308	0.666667	0.357143	0.4	-0.9304	0.8657	0.0071
New.ReferenceOTU40	k__Bacteria; p__Firmicutes; c__Clostridia; o__Clostridiales; f__Ruminococcaceae; g__; s__	0.6	0.65	0.692308	0.666667	0.785714	0.866667	0.9721	0.945	0.0012
New.CleanUp.ReferenceOTU193	k__Bacteria; p__Firmicutes; c__Clostridia; o__Clostridiales; f__Ruminococcaceae; g__; s__	0.733333	0.55	0.615385	0.555556	0.357143	0.266667	-0.9634	0.9282	0.002
AB555205.1.1489	k__Bacteria; p__Firmicutes; c__Clostridia; o__Clostridiales; f__Ruminococcaceae; g__; s__	0.266667	0.3	0.461538	0.388889	0.571429	0.733333	0.9585	0.9187	0.0026
EU468560.1.1341	k__Bacteria; p__Firmicutes; c__Clostridia; o__Clostridiales; f__Ruminococcaceae; g__; s__	0.533333	0.45	0.307692	0.222222	0	0	-0.9571	0.916	0.0027
JQ191109.1.1350	k__Bacteria; p__Firmicutes; c__Clostridia; o__Clostridiales; f__Ruminococcaceae; g__; s__	0.533333	0.45	0.461538	0.277778	0.285714	0.133333	-0.9569	0.9157	0.0027
AB185517.1.1534	k__Bacteria; p__Firmicutes; c__Clostridia; o__Clostridiales; f__Ruminococcaceae; g__; s__	0.266667	0.4	0.307692	0.444444	0.5	0.733333	0.9431	0.8895	0.0048
JX096256.1.1372	k__Bacteria; p__Firmicutes; c__Clostridia; o__Clostridiales; f__Ruminococcaceae; g__; s__	0.8	0.85	0.846154	0.944444	0.928571	1	0.9425	0.8883	0.0049
EU467417.1.1251	k__Bacteria; p__Firmicutes; c__Clostridia; o__Clostridiales; f__Ruminococcaceae; g__; s__	0.266667	0.35	0.307692	0.388889	0.642857	0.666667	0.9384	0.8806	0.0056
KR514445.1.1442	k__Bacteria; p__Firmicutes; c__Clostridia; o__Clostridiales; f__Ruminococcaceae; g__; s__	0.6	0.75	0.692308	0.722222	0.785714	0.866667	0.922	0.8501	0.0089
JX095350.1.1407	k__Bacteria; p__Firmicutes; c__Clostridia; o__Clostridiales; f__Ruminococcaceae; g__; s__	0.8	0.9	0.923077	0.944444	1	1	0.9204	0.8471	0.0093
JX095196.1.1370	k__Bacteria; p__Firmicutes; c__Clostridia; o__Clostridiales; f__Ruminococcaceae; g__; s__	1	0.95	1	0.833333	0.857143	0.733333	-0.9084	0.8252	0.0122
LC028716.1.1521	k__Bacteria; p__Firmicutes; c__Clostridia; o__Clostridiales; f__Ruminococcaceae; g__; s__	0.666667	0.65	0.461538	0.444444	0.428571	0.333333	-0.9079	0.8243	0.0123
FJ880875.1.1473	k__Bacteria; p__Firmicutes; c__Clostridia; o__Clostridiales; f__Ruminococcaceae; g__; s__	0.333333	0.5	0.538462	0.388889	0.642857	0.866667	0.8941	0.7994	0.0162
JX095407.1.1402	k__Bacteria; p__Firmicutes; c__Clostridia; o__Clostridiales; f__Ruminococcaceae; g__; s__	0.133333	0.25	0.384615	0.277778	0.571429	0.533333	0.8928	0.7971	0.0166
JQ820142.1.1478	k__Bacteria; p__Firmicutes; c__Clostridia; o__Clostridiales; f__Ruminococcaceae; g__; s__	0.266667	0.55	0.615385	0.5	0.785714	0.8	0.8898	0.7917	0.0175
EU470044.1.1399	k__Bacteria; p__Firmicutes; c__Clostridia; o__Clostridiales; f__Ruminococcaceae; g__; s__	0.466667	0.5	0.384615	0.333333	0.142857	0.2	-0.8864	0.7858	0.0186
New.ReferenceOTU58	k__Bacteria; p__Firmicutes; c__Clostridia; o__Clostridiales; f__Ruminococcaceae; g__; s__	0.333333	0.55	0.692308	0.666667	0.714286	0.8	0.8812	0.7765	0.0203
LC028825.1.1520	k__Bacteria; p__Firmicutes; c__Clostridia; o__Clostridiales; f__Ruminococcaceae; g__; s__	0.533333	0.65	0.846154	0.833333	0.785714	1	0.876	0.7673	0.0221
EU774819.1.1394	k__Bacteria; p__Firmicutes; c__Clostridia; o__Clostridiales; f__Ruminococcaceae; g__; s__	0.466667	0.55	0.384615	0.388889	0.357143	0.2	-0.8757	0.7668	0.0222
KC162992.1.1526	k__Bacteria; p__Firmicutes; c__Clostridia; o__Clostridiales; f__Ruminococcaceae; g__; s__	0.8	0.85	0.769231	0.722222	0.714286	0.666667	-0.874	0.7639	0.0228
EU468758.1.1260	k__Bacteria; p__Firmicutes; c__Clostridia; o__Clostridiales; f__Ruminococcaceae; g__; s__	0.266667	0.65	0.615385	0.777778	0.857143	0.866667	0.8733	0.7626	0.0231
JX096143.1.1401	k__Bacteria; p__Firmicutes; c__Clostridia; o__Clostridiales; f__Ruminococcaceae; g__; s__	0.933333	0.8	0.692308	0.833333	0.714286	0.533333	-0.8712	0.7589	0.0238
JX096359.1.1376	k__Bacteria; p__Firmicutes; c__Clostridia; o__Clostridiales; f__Ruminococcaceae; g__; s__	0.666667	0.7	0.692308	0.611111	0.285714	0.333333	-0.8645	0.7474	0.0263
AB746729.1.1523	k__Bacteria; p__Firmicutes; c__Clostridia; o__Clostridiales; f__Ruminococcaceae; g__; s__	0.333333	0.3	0.384615	0.5	0.428571	0.866667	0.8627	0.7442	0.027
FJ680365.1.1442	k__Bacteria; p__Firmicutes; c__Clostridia; o__Clostridiales; f__Ruminococcaceae; g__; s__	1	1	1	1	0.928571	0.933333	-0.8565	0.7336	0.0294
FJ951892.1.1480	k__Bacteria; p__Firmicutes; c__Clostridia; o__Clostridiales; f__Ruminococcaceae; g__; s__	0.666667	0.6	0.769231	0.777778	0.857143	0.866667	0.8555	0.7319	0.0298
New.ReferenceOTU152	k__Bacteria; p__Firmicutes; c__Clostridia; o__Clostridiales; f__Ruminococcaceae; g__; s__	0.2	0.45	0.384615	0.388889	0.5	0.533333	0.8465	0.7166	0.0335
EU772225.1.1386	k__Bacteria; p__Firmicutes; c__Clostridia; o__Clostridiales; f__Ruminococcaceae; g__; s__	1	0.9	0.846154	0.777778	0.857143	0.733333	-0.8464	0.7164	0.0336
LC028889.1.1529	k__Bacteria; p__Firmicutes; c__Clostridia; o__Clostridiales; f__Ruminococcaceae; g__; s__	0.4	0.5	0.692308	0.777778	0.714286	0.8	0.8396	0.705	0.0365
JX095532.1.1397	k__Bacteria; p__Firmicutes; c__Clostridia; o__Clostridiales; f__Ruminococcaceae; g__; s__	0.6	0.45	0.692308	0.722222	0.785714	0.866667	0.83	0.6889	0.0409
LC028686.1.1523	k__Bacteria; p__Firmicutes; c__Clostridia; o__Clostridiales; f__Ruminococcaceae; g__; s__	0.4	0.5	0.615385	0.777778	0.785714	0.733333	0.8192	0.6711	0.0461
JX095159.1.1382	k__Bacteria; p__Firmicutes; c__Clostridia; o__Clostridiales; f__Ruminococcaceae; g__; s__	0.333333	0.5	0.615385	0.555556	0.785714	0.666667	0.8147	0.6637	0.0483
New.CleanUp.ReferenceOTU30393	k__Bacteria; p__Firmicutes; c__Clostridia; o__Clostridiales; f__Ruminococcaceae; g__; s__	0.6	0.7	0.846154	0.833333	0.857143	0.866667	0.8147	0.6638	0.0483
GU304302.1.1499	k__Bacteria; p__Firmicutes; c__Clostridia; o__Clostridiales; f__Ruminococcaceae; g__; s__	0.533333	0.4	0.384615	0.5	0.357143	0.266667	-0.813	0.661	0.0492
JX095377.1.1386	k__Bacteria; p__Firmicutes; c__Clostridia; o__Clostridiales; f__Ruminococcaceae; g__; s__	0.266667	0.35	0.461538	0.5	0.642857	0.8	0.9954	0.9908	<0.0001
LC028773.1.1520	k__Bacteria; p__Firmicutes; c__Clostridia; o__Clostridiales; f__Ruminococcaceae; g__Oscillospira; s__	0.866667	0.9	0.923077	0.944444	0.928571	1	0.9326	0.8698	0.0067
New.CleanUp.ReferenceOTU15973	k__Bacteria; p__Firmicutes; c__Clostridia; o__Clostridiales; f__Ruminococcaceae; g__Oscillospira; s__	0.8	0.75	0.769231	0.777778	0.714286	0.666667	-0.9175	0.8417	0.0099
LC028730.1.1519	k__Bacteria; p__Firmicutes; c__Clostridia; o__Clostridiales; f__Ruminococcaceae; g__Oscillospira; s__	0.466667	0.75	0.692308	0.777778	0.785714	0.866667	0.8474	0.7181	0.0331
AB746831.1.1523	k__Bacteria; p__Firmicutes; c__Clostridia; o__Clostridiales; f__Ruminococcaceae; g__Ruminococcus; s__	0.866667	0.8	0.692308	0.722222	0.714286	0.466667	-0.9127	0.833	0.0111
LAQZ01000049.1994.3490	k__Bacteria; p__Firmicutes; c__Clostridia; o__Clostridiales; f__Ruminococcaceae; g__Ruminococcus; s__	0.733333	0.8	0.846154	0.833333	0.857143	0.866667	0.8521	0.7261	0.0312
LC028605.1.1547	k__Bacteria; p__Firmicutes; c__Clostridia; o__Clostridiales; f__Veillonellaceae; g__Phascolarctobacterium; s__	0.733333	0.7	0.769231	0.833333	0.785714	0.933333	0.86	0.7397	0.028
FJ680526.1.1380	k__Bacteria; p__Firmicutes; c__Erysipelotrichi; o__Erysipelotrichales; f__Erysipelotrichaceae; g__; s__	0.533333	0.3	0.307692	0.111111	0.214286	0.0666667	-0.8618	0.7427	0.0273
JF797368.1.1317	k__Bacteria; p__Firmicutes; c__Erysipelotrichi; o__Erysipelotrichales; f__Erysipelotrichaceae; g__Bulleidia; s__	0.666667	0.45	0.461538	0.388889	0.0714286	0.2	-0.885	0.7831	0.0191
AB612352.1.1476	k__Bacteria; p__Lentisphaerae; c__[Lentisphaeria]; o__Victivallales; f__Victivallaceae; g__; s__	0.6	0.35	0.384615	0.222222	0.214286	0.2	-0.8556	0.7321	0.0298
AB555124.1.1500	k__Bacteria; p__Planctomycetes; c__Planctomycetia; o__Pirellulales; f__Pirellulaceae; g__; s__	0.266667	0.3	0.230769	0.277778	0.5	0.466667	0.8169	0.6674	0.0472
LC028738.1.1473	k__Bacteria; p__Proteobacteria; c__Alphaproteobacteria; o__; f__; g__; s__	0.733333	0.5	0.615385	0.611111	0.357143	0.4	-0.8206	0.6734	0.0454
New.CleanUp.ReferenceOTU27936	k__Bacteria; p__Proteobacteria; c__Alphaproteobacteria; o__RF32; f__; g__; s__	0.533333	0.35	0.384615	0.222222	0.357143	0.133333	-0.8313	0.6911	0.0403
New.CleanUp.ReferenceOTU1931	k__Bacteria; p__Spirochaetes; c__Spirochaetes; o__M2PT2-76; f__; g__; s__	0.266667	0.45	0.538462	0.555556	0.785714	0.666667	0.8649	0.748	0.0262
EU794314.1.1470	k__Bacteria; p__Spirochaetes; c__Spirochaetes; o__Spirochaetales; f__Spirochaetaceae; g__Treponema; s__	0.333333	0.2	0.307692	0.388889	0.642857	0.666667	0.8719	0.7602	0.0236
JX096311.1.1429	k__Bacteria; p__Tenericutes; c__Mollicutes; o__RF39; f__; g__; s__	0.333333	0.4	0.384615	0.444444	0.5	0.533333	0.9781	0.9567	0.0007
GQ448678.1.1403	k__Bacteria; p__Tenericutes; c__Mollicutes; o__RF39; f__; g__; s__	0.133333	0.5	0.307692	0.333333	0.642857	0.666667	0.8468	0.7171	0.0334
New.CleanUp.ReferenceOTU25473	k__Bacteria; p__Tenericutes; c__RF3; o__ML615J-28; f__; g__; s__	0.866667	0.7	0.615385	0.5	0.5	0.466667	-0.8887	0.7897	0.0179
AB555004.1.1500	k__Bacteria; p__Verrucomicrobia; c__Verruco-5; o__WCHB1-41; f__RFP12; g__; s__	0.266667	0.4	0.461538	0.5	0.428571	0.8	0.8829	0.7795	0.0198
GU174144.1.1515	k__Bacteria; p__Verrucomicrobia; c__Verruco-5; o__WCHB1-41; f__RFP12; g__; s__	0.2	0.35	0.230769	0.333333	0.357143	0.6	0.8813	0.7767	0.0203
EF436358.1.1502	k__Bacteria; p__Verrucomicrobia; c__Verruco-5; o__WCHB1-41; f__RFP12; g__; s__	0.6	0.6	0.692308	0.666667	0.785714	0.733333	0.8259	0.6821	0.0428
AB555273.1.1500	k__Bacteria; p__Verrucomicrobia; c__Verruco-5; o__WCHB1-41; f__RFP12; g__; s__	0.533333	0.3	0.307692	0.333333	0.357143	0.0666667	-0.8229	0.6772	0.0442
Note: Only OTUs with the significant prevalence correlated with breed composition were included in the table.
